# Supplementary material for: Bone Morphogenetic Protein 6 Inhibits the Immunomodulatory Property of BMMSCs via Id1 in Sjögren’s Syndrome
Source: Hindawi journal article supplement (doi:10.1155/2018/9837035), 2018-08-02

# Supplementary Figure 1: Surface makers of BMMSCs

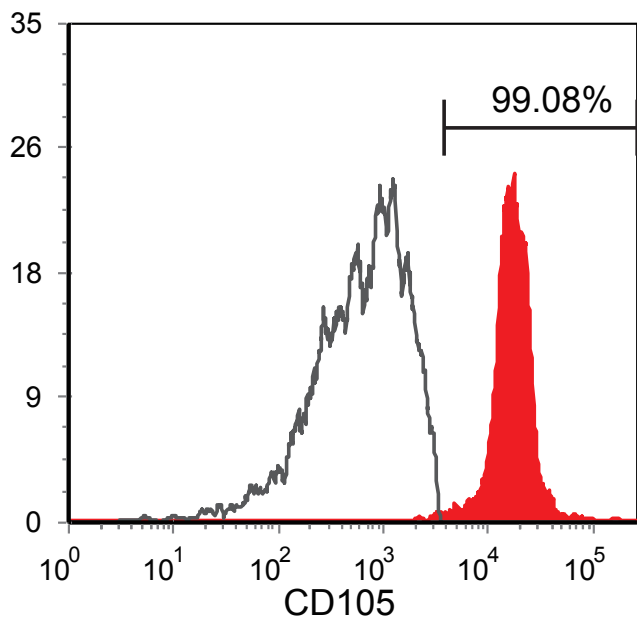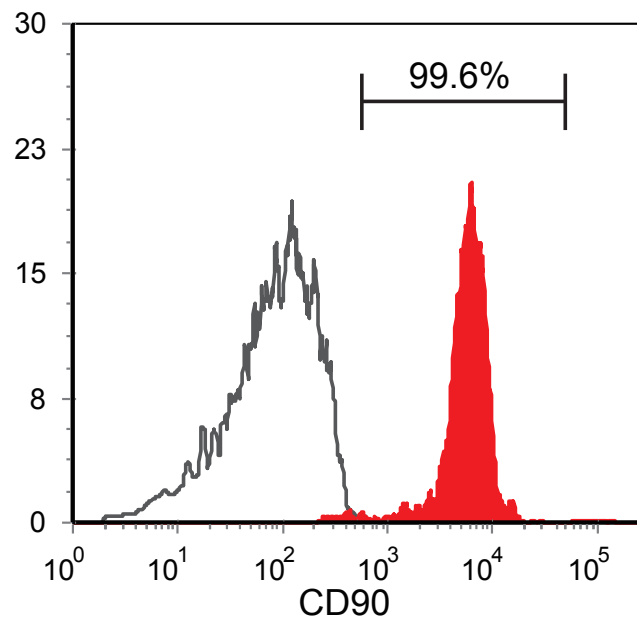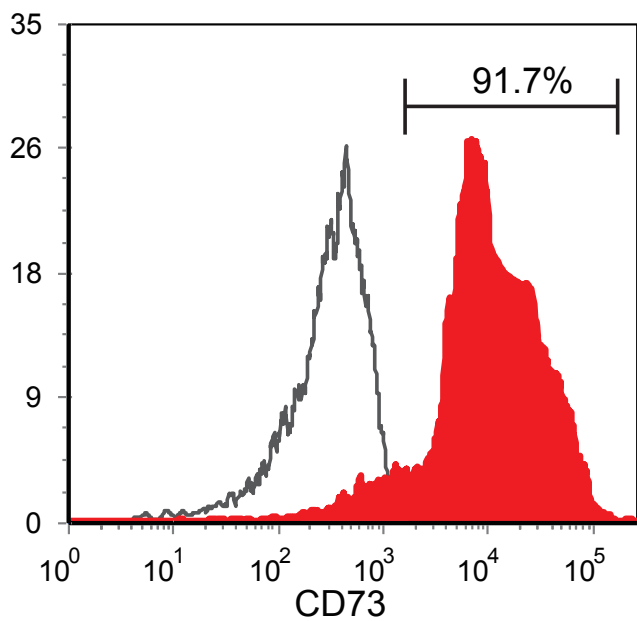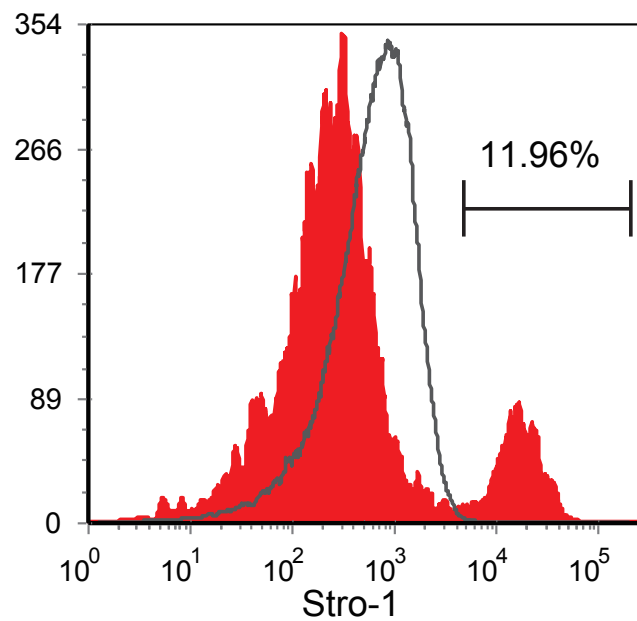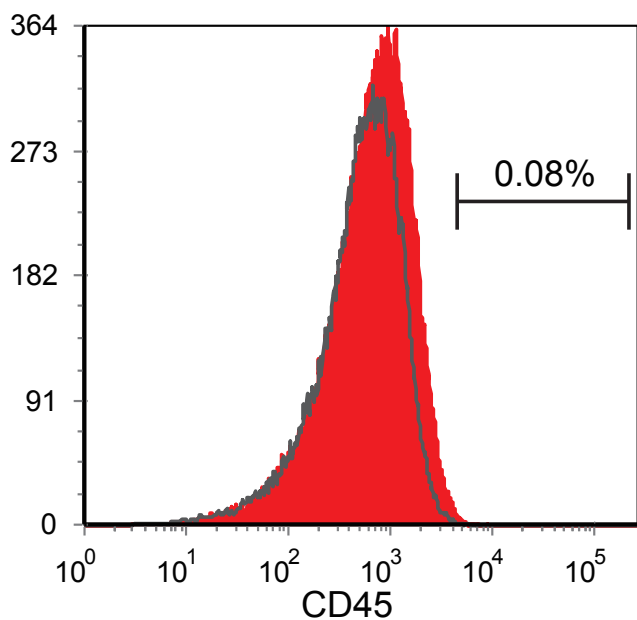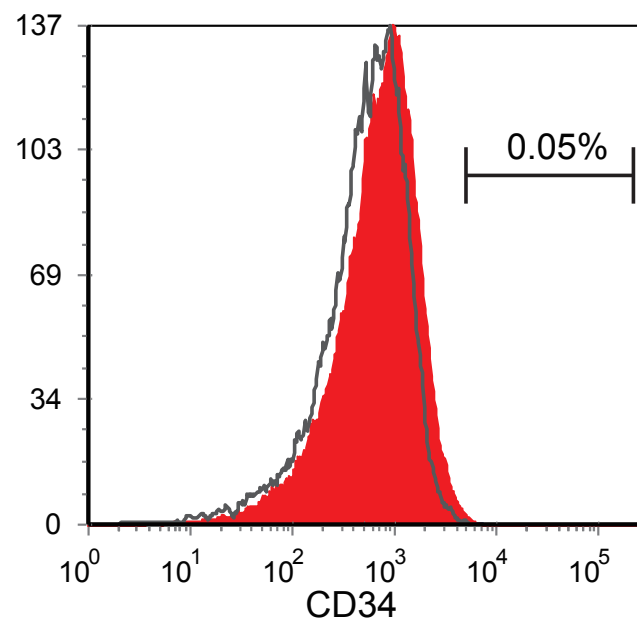

Supplement: f1 [file 9837035.f1.pdf]
